# Supplementary material for: Serum long noncoding RNA HOTAIR as a novel diagnostic and prognostic biomarker in glioblastoma multiforme
Source: PubMed Central journal article supplement (PMC5861620; doi:10.1186/s12943-018-0822-0), 2018-03-20

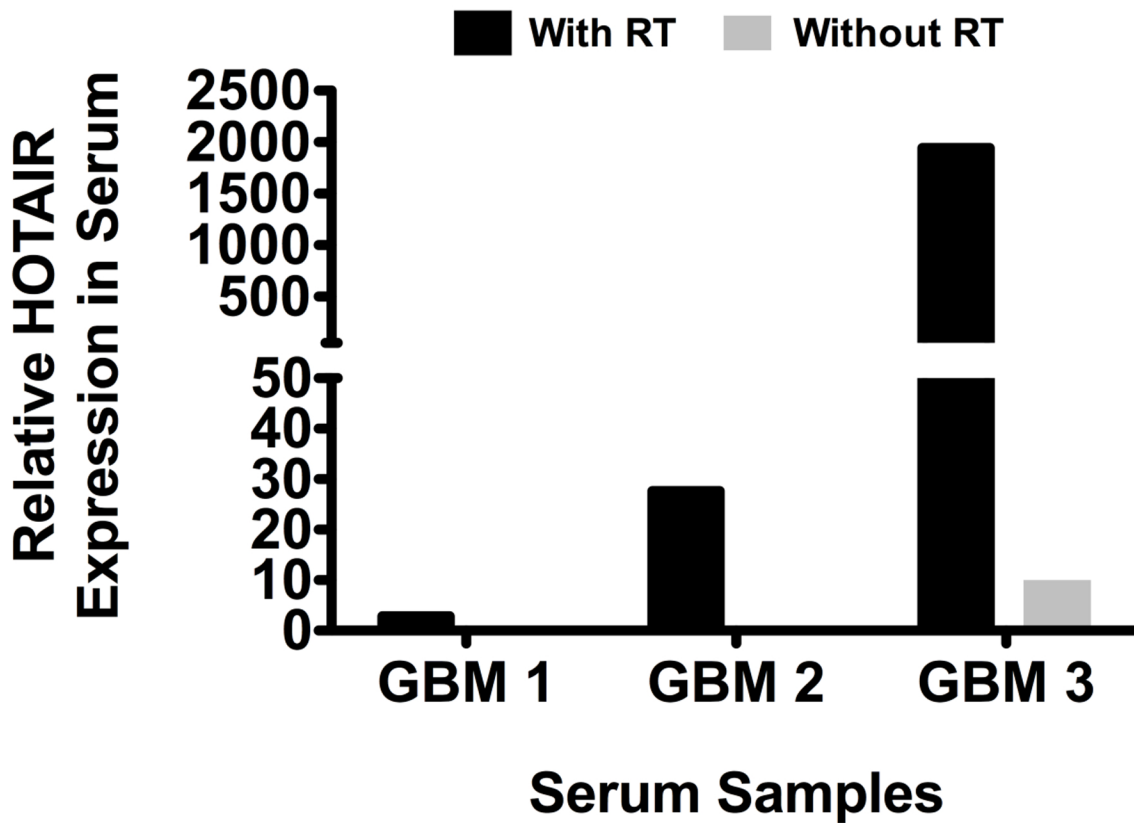

Supplement: 12943_2018_822_MOESM2_ESM.pdf [file 12943_2018_822_MOESM2_ESM.pdf]
